# Supplementary material
Source: publisher figshare collection journal article supplement (https://sage.figshare.com/ndownloader/files/14004056)
Supplement: Supplementary file 1 [file 14004056]

| <b>APEC member countries and World Bank income designation</b> |          |                   |                   |
|----------------------------------------------------------------|----------|-------------------|-------------------|
| <b>Income level</b>                                            | <b>N</b> | <b>Country</b>    | <b>Population</b> |
| <b>Low</b>                                                     | 0        | -                 | -                 |
| <b>Lower-middle</b>                                            | 4        | Indonesia         | 267,758,248       |
|                                                                |          | Papua New Guinea  | 8,474,270         |
|                                                                |          | Philippines       | 107,046,245       |
|                                                                |          | Vietnam           | 96,807,730        |
| <b>Upper-middle</b>                                            | 5        | China*            | 1,448,072,460     |
|                                                                |          | Malaysia          | 32,183,144        |
|                                                                |          | Mexico            | 130,759,074       |
|                                                                |          | Peru              | 32,681,038        |
|                                                                |          | Thailand          | 69,234,047        |
| <b>High</b>                                                    | 10       | Australia         | 24,882,232        |
|                                                                |          | Brunei Darussalam | 428,697           |
|                                                                |          | Canada            | 37,067,353        |
|                                                                |          | Chile             | 18,246,422        |
|                                                                |          | Japan             | 127,081,603       |
|                                                                |          | New Zealand       | 4,764,678         |
|                                                                |          | Republic of Korea | 51,227,402        |
|                                                                |          | United States     | 329,256,465       |
|                                                                |          | Russia            | 143,955,923       |
|                                                                |          | Singapore         | 5,819,770         |

\*China includes People's Republic of China, Taiwan and Hong Kong.

**Supplementary Table 2.** APEC member economies, income levels and populations.
